# Supplementary material for: Characterisation of Aspergillus fumigatus Endocytic Trafficking within Airway Epithelial Cells Using High-Resolution Automated Quantitative Confocal Microscopy
Source: MDPI journal article supplement (doi:10.3390/jof7060454), 2021-06-07
Supplement: s1 [file s1]

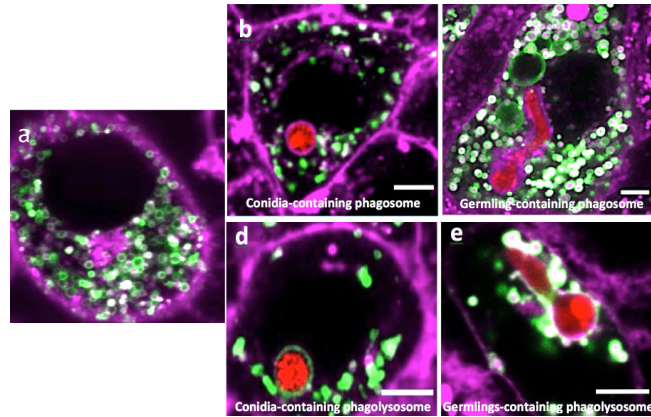

**Figure S1.** Variation in the number of lysosomes during phagolysosome development. Number and locations of lysosomes in (a) Uninfected, (b) Phagosome-containing conidia, (c) Germling-containing phagosome, (d) Conidia-containing phagolysosome and (e) Germling-containing phagolysosome of A549 alveolar epithelial cells. Red = conidia, green = lysosome, magenta = plasma membrane. Scale Bar = 5  $\mu$ m. Magenta = Cell Mask Deep Red, Green = GFP-LAMP1, Red = MFIGRag29 (Table S1).

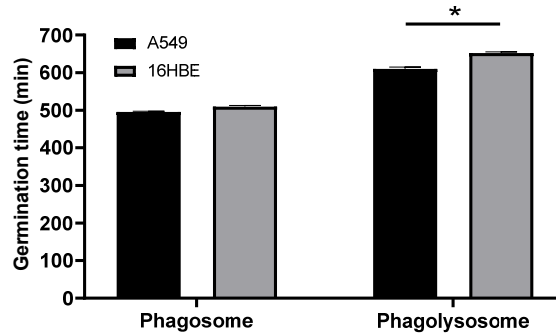

**Figure S1.** Germination of *A. fumigatus* spores within phagolysosomes is delayed compared to germination time within phagosomes. Data shown as mean  $\pm$  standard deviation of three biological and technical replicates. \*  $P < 0.05$ . Asterisks represent differences between cell lines.

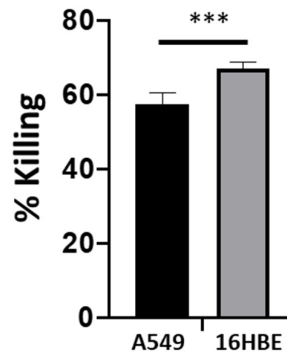

**Figure S3:** Proportion of killed spores within acidic phagosomes of 16HBE and A549 epithelial cell. Data shown as mean  $\pm$  standard deviation of three biological and technical replicates. Asterisks represent differences between cell lines (\*\* $P < 0.001$ ).

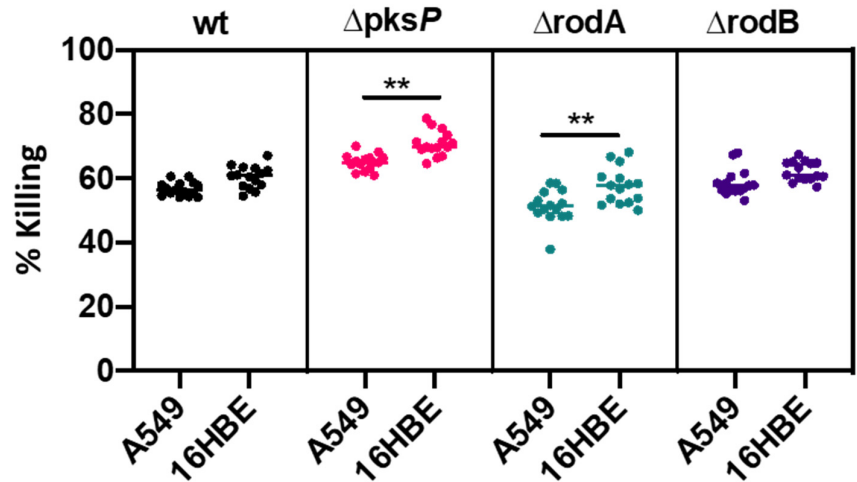

**Figure S4:** Percentage of *A. fumigatus* spore killed within epithelial cells. Data represents Mean and standard deviation of three biological and technical replicates. Asterisks represents differences between cell lines. (\*\* $P < 0.001$ ).

**Table S1.** *A. fumigatus* strains used in this study.

| Strain      | Function                                        | Gene name   | Parental strain                                                          |
|-------------|-------------------------------------------------|-------------|--------------------------------------------------------------------------|
| A1160       | -                                               | -           | CEA10 (CBS1144.89)                                                       |
| MFIGGFP4    | Cytoplasmic GFP                                 | -           | A1163 (FGSC A1163)<br>( <i>pyrG::βtub-GFP,pyrG<sup>+</sup></i> )         |
| MFIGRag29   | Cytoplasmic RFP                                 | -           | A1163 (FGSC A1163)<br>( <i>pyrG::βtub-TurboRFP635,pyrG<sup>+</sup></i> ) |
| A1160_ΔrodA | Rodlet layer protein A                          | AFUB_057130 | A1160, ΔKu80 <i>pyrG<sup>+</sup></i>                                     |
| A1160_ΔrodB | Rodlet layer protein B                          | AFUB_016640 | A1160, ΔKu80 <i>pyrG<sup>+</sup></i>                                     |
| A1160_ΔpKsP | Polyketide synthase<br>required for DHN-melanin | AFUB_033290 | A1160, ΔKu80 <i>pyrG<sup>+</sup></i>                                     |

**Table S2.** Comparison of automated and manual spore calling results within phagolysosomes (PL) in five independent images. Cohen's K represents Kappa test.

|                 | Manual     |                 |          | Automated  |                 |          | Cohen's K % Agreement |              |
|-----------------|------------|-----------------|----------|------------|-----------------|----------|-----------------------|--------------|
|                 | Total      | Within fused PL | % Fusion | Total      | Within fused PL | % Fusion |                       |              |
| 1               | 25         | 12              | 48       | 28         | 15              | 53       | 0.84                  | 92.68        |
| 2               | 27         | 6               | 22       | 23         | 10              | 43       | 0.65                  | 85.18        |
| 3               | 44         | 17              | 38       | 42         | 19              | 45       | 0.82                  | 91.12        |
| 4               | 20         | 4               | 20       | 35         | 10              | 28       | 0.42                  | 76.92        |
| 5               | 39         | 16              | 41       | 31         | 14              | 45       | 0.74                  | 91.30        |
| <b>Total</b>    | <b>155</b> | <b>55</b>       |          | <b>159</b> | <b>68</b>       |          | <b>0.7</b>            | <b>87.5%</b> |
| <b>% Fusion</b> |            | <b>35%</b>      |          |            | <b>42%</b>      |          |                       |              |

**Table S3.** Comparison of automated and manual spore calling results within acidified phagosomes (AF) in five independent images. Cohen's K represents Kappa test.

|                    | Manual     |            |    | Automated  |            |    | Cohen's K   | % Agreement |
|--------------------|------------|------------|----|------------|------------|----|-------------|-------------|
|                    | Total      | Within AP  | %  | Total      | Within AP  | %  |             |             |
| <b>1</b>           | 22         | 5          | 23 | 27         | 7          | 26 | 0.79        | 93.10       |
| <b>2</b>           | 27         | 8          | 30 | 23         | 5          | 21 | 0.57        | 84.73       |
| <b>3</b>           | 35         | 10         | 28 | 37         | 6          | 16 | 0.64        | 89.13       |
| <b>4</b>           | 23         | 2          | 8  | 19         | 2          | 10 | 0.43        | 84          |
| <b>5</b>           | 38         | 6          | 16 | 34         | 7          | 20 | 0.90        | 97.56       |
| <b>Total</b>       | <b>145</b> | <b>31</b>  |    | <b>140</b> | <b>27</b>  |    | <b>0.66</b> | <b>89.7</b> |
| <b>% Acidified</b> |            | <b>21%</b> |    |            | <b>19%</b> |    |             |             |
